# Supplementary material for: Premature aging of skeletal stem/progenitor cells rather than osteoblasts causes bone loss with decreased mechanosensation
Source: PubMed Central journal article supplement (PMC10322990; doi:10.1038/s41413-023-00269-6), 2023-07-05

**Fig S1 a**

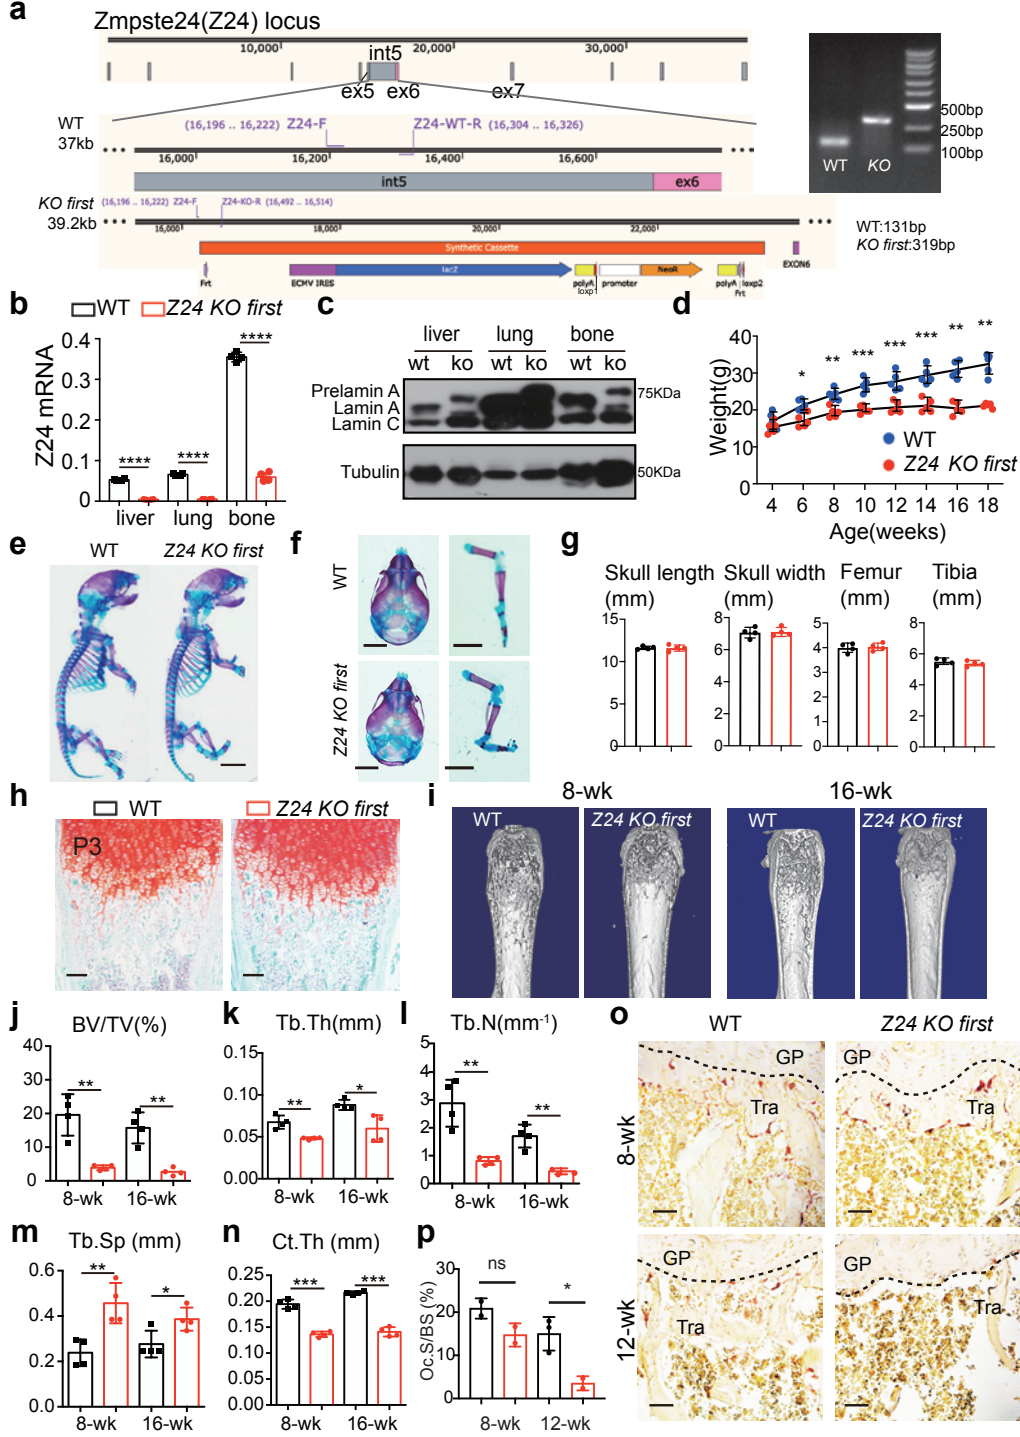

**Fig S2**

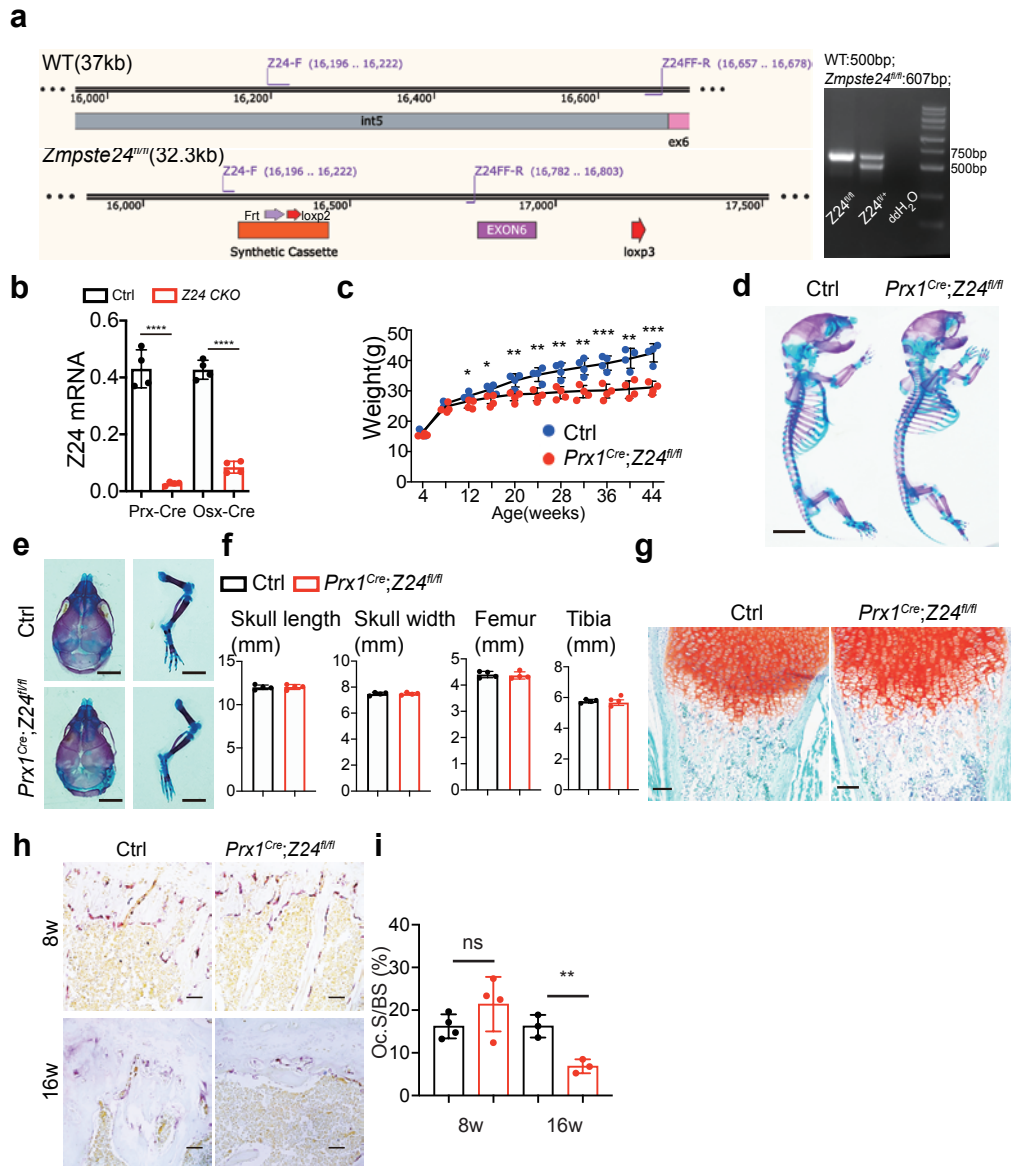

**Fig S3**

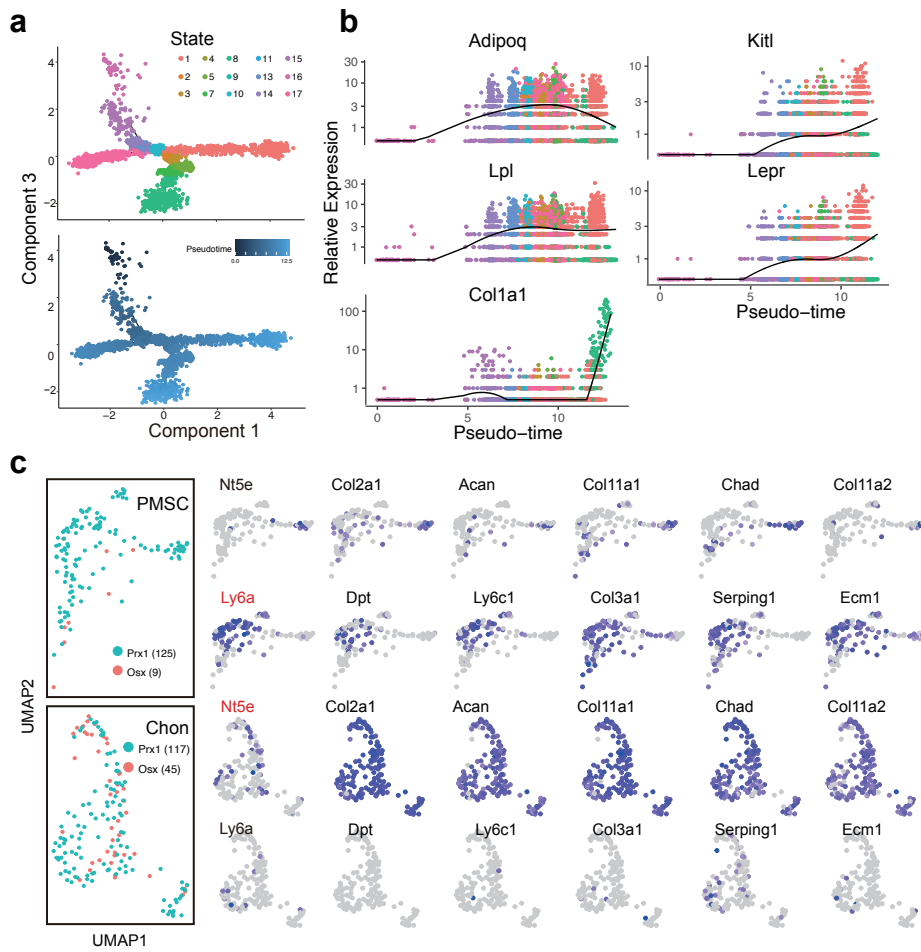

**Fig S4**

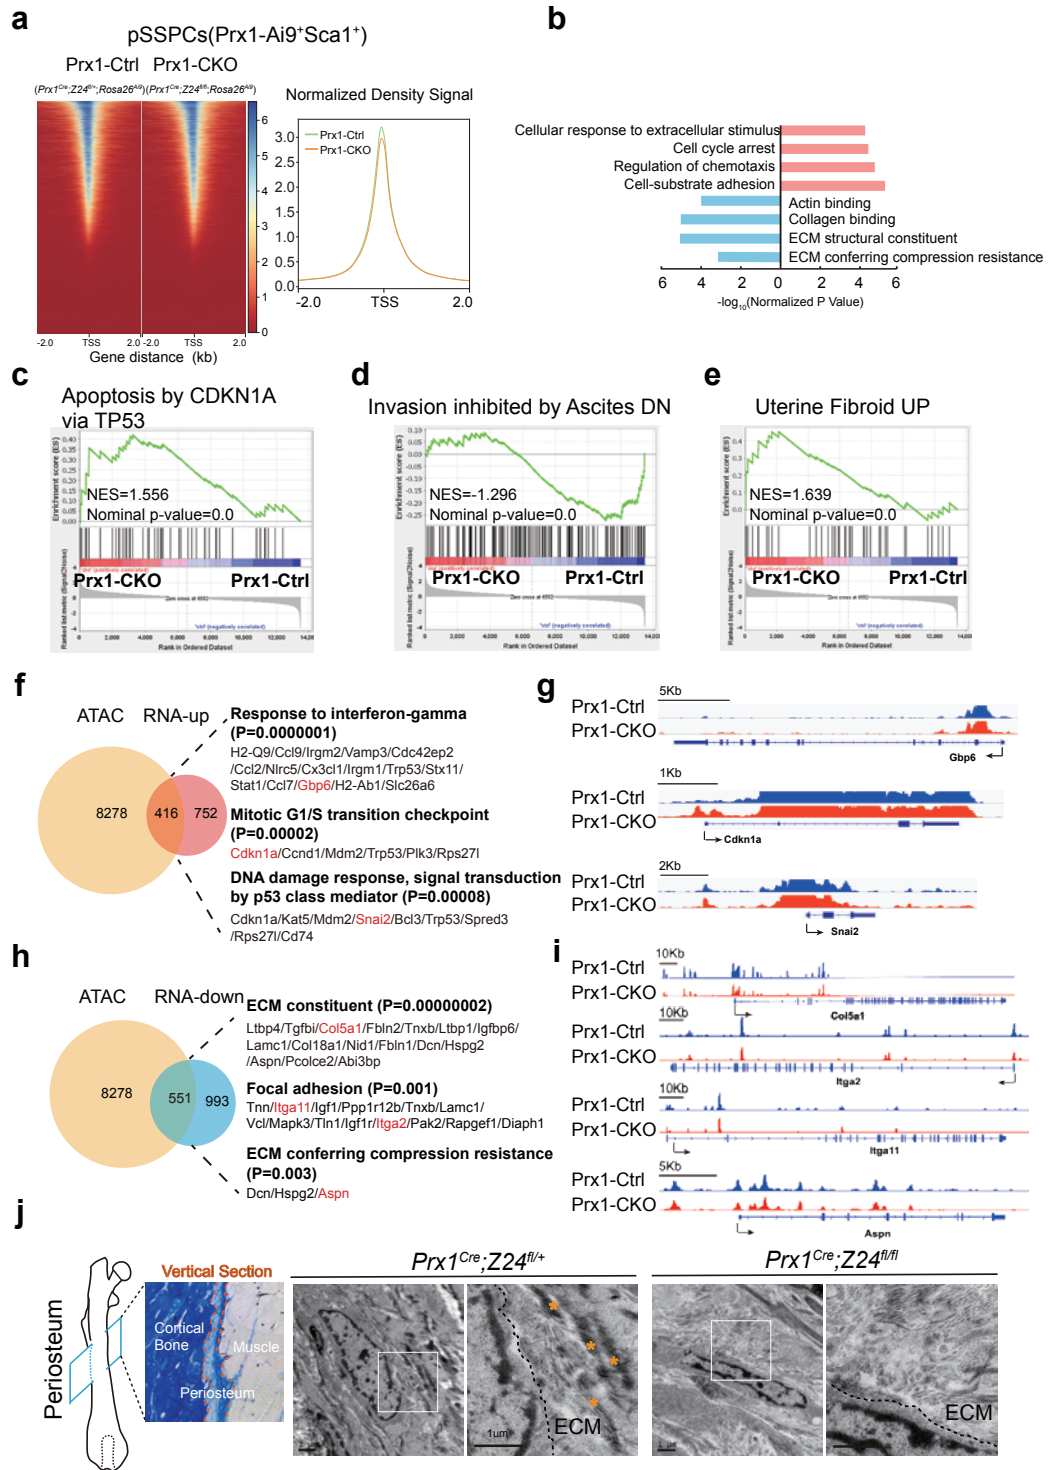

**Fig S5**

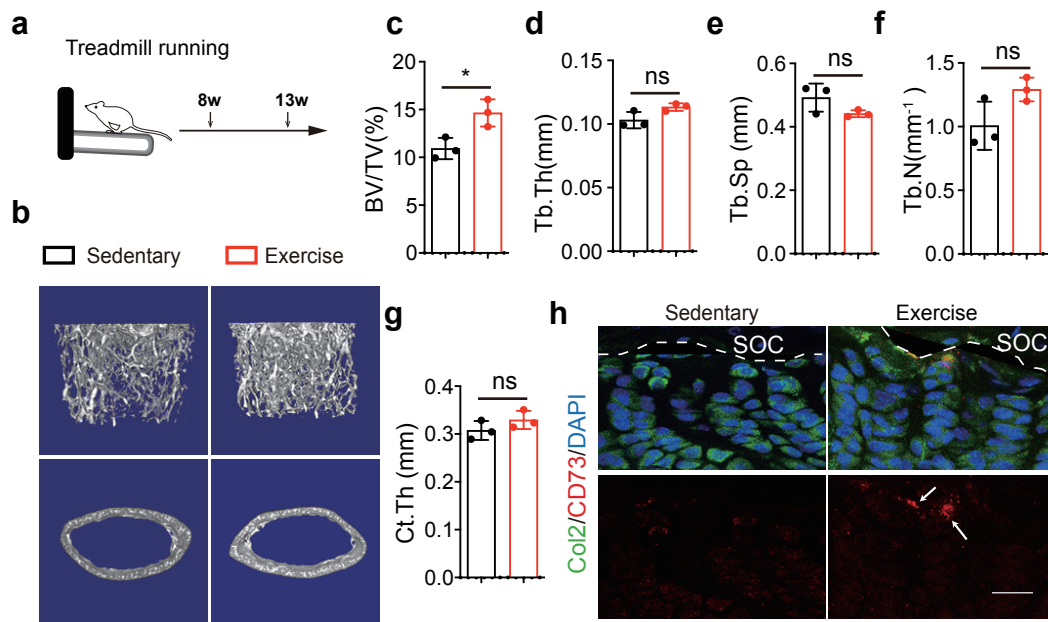

**Fig S6**

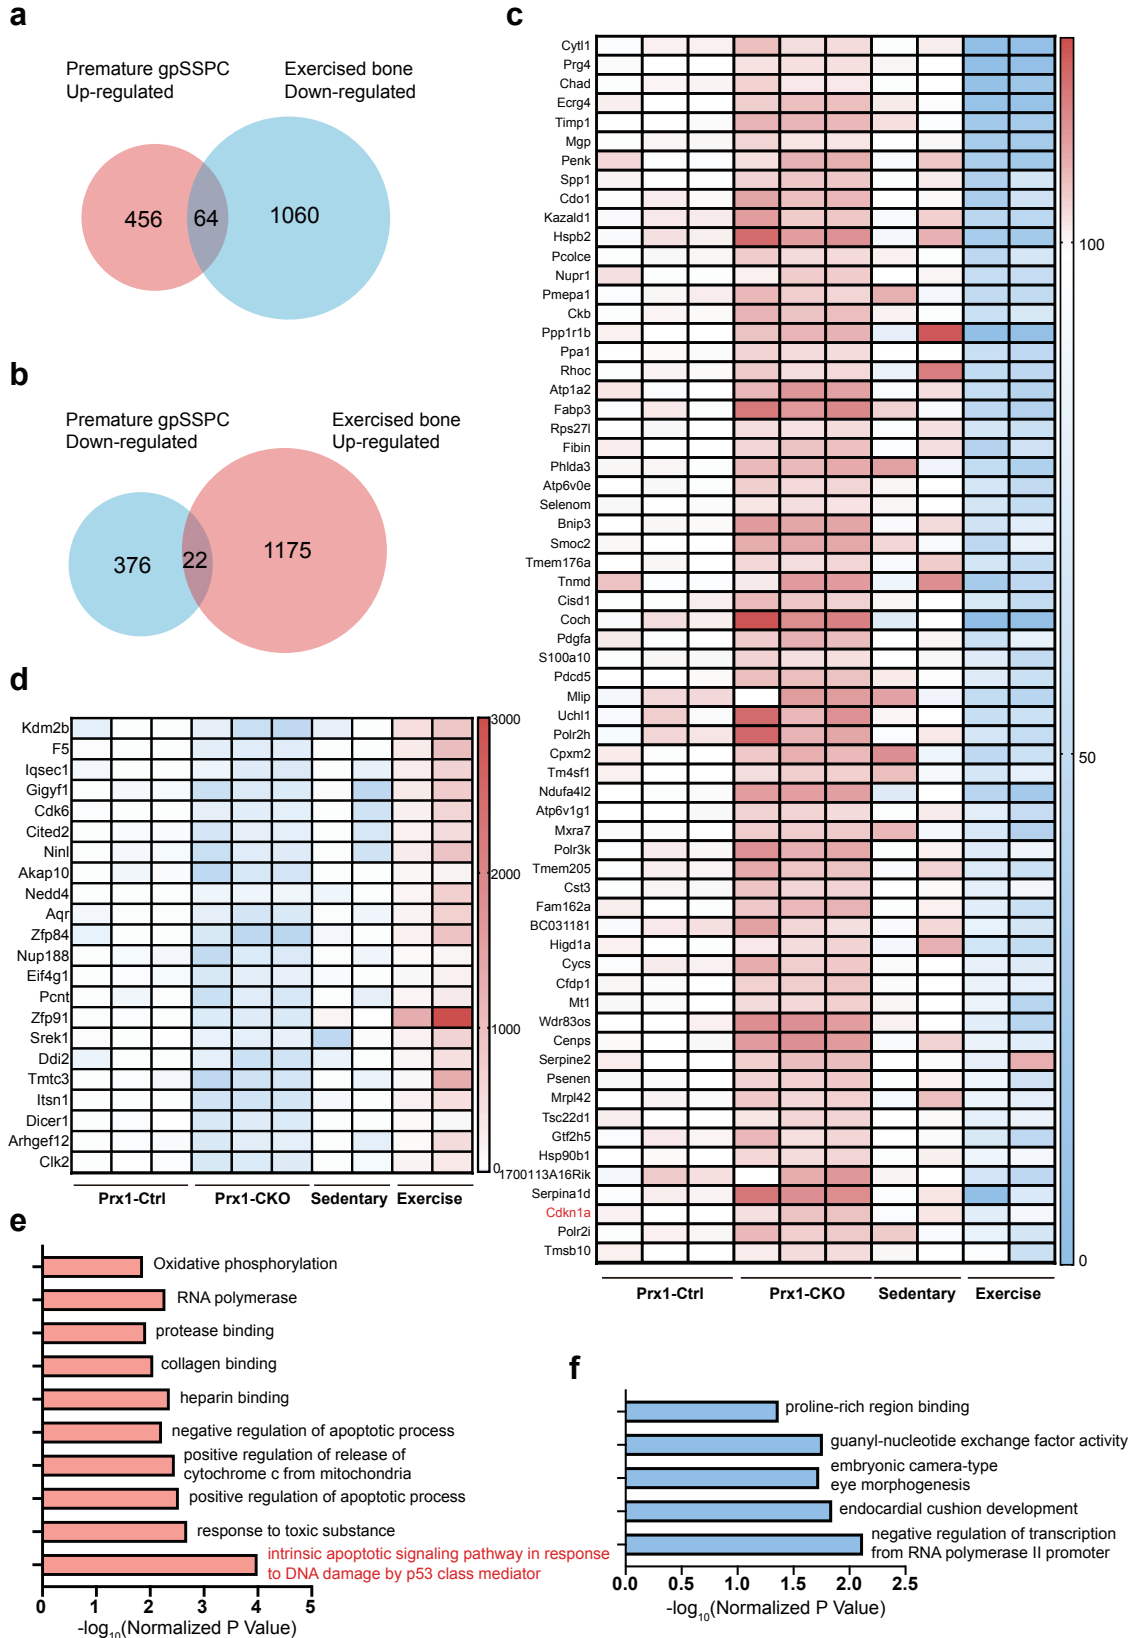

**Fig S7**

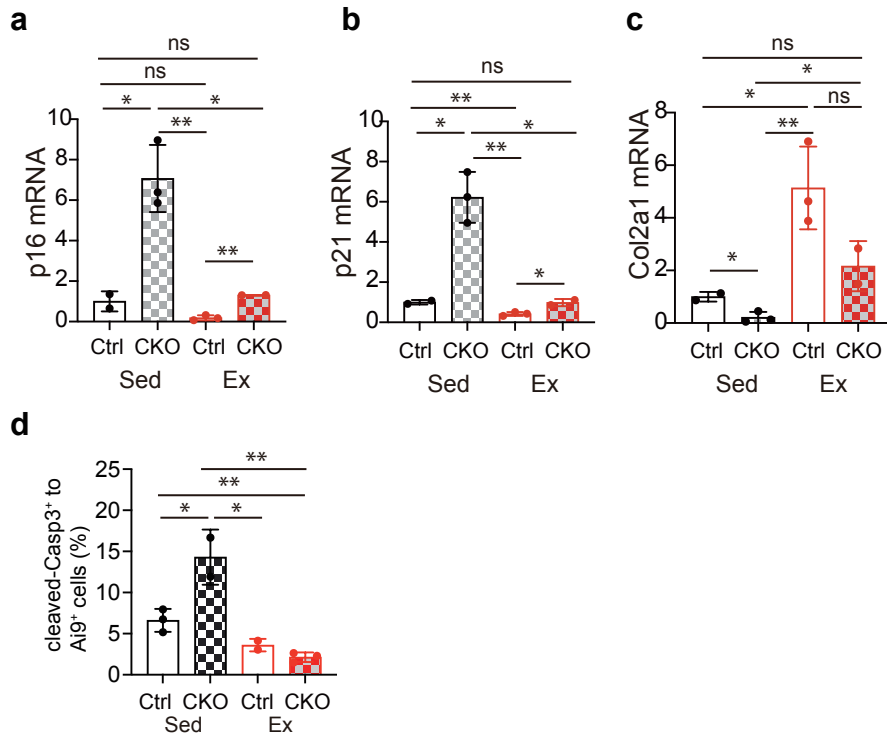

Supplement: 41413_2023_269_MOESM3_ESM.pdf [file 41413_2023_269_MOESM3_ESM.pdf]
